# Supplementary material for: Novel nitrogen-doped KFeS2/C composites for the efficient removal of Cr(vi)
Source: Royal Society of Chemistry journal article supplement (doi:10.1039/d0en01283a), 2021-01-01
Supplement: d0en01283a1.pdf [file d0en01283a1.pdf]

## Electronic Supplementary Information

### A Novel Nitrogen-Doped KFeS<sub>2</sub>/C Composites for Efficient Removal of Cr(VI)

Qiaohong Su <sup>a, d</sup>, Adnan Ali Khan <sup>c</sup>, Zhi Su <sup>d</sup>, Chen Tian <sup>a</sup>, Xiaoqin Li <sup>a</sup>, Jiahua Gu <sup>a</sup>, Ting Zhang <sup>a</sup>,

Rashid Ahmad <sup>c\*\*</sup>, Xintai Su <sup>a, b\*</sup>, Zhang Lin <sup>a, b</sup>

<sup>a</sup> School of Environment and Energy, Guangdong Provincial Key Laboratory of Solid Wastes

Pollution Control and Recycling, South China University of Technology, Guangzhou, Guangdong

510006, China

<sup>b</sup> Sino-Singapore International Joint Research Institute (SSIJRI), Guangzhou 510000, China.

<sup>c</sup> Department of Chemistry, University of Malakand, Chakdara, Khyber Pakhtunkhwa, Pakistan

<sup>d</sup> College of Chemistry and Chemical Engineering, Xinjiang Normal University, Urumqi 830054,

Xinjiang, China

\*Corresponding authors email address: [suxintai827@163.com](mailto:suxintai827@163.com), [rashmad@gmail.com](mailto:rashmad@gmail.com) (Rashid

Ahmad )

## Analyses of the adsorption data

The equilibrium adsorption capacity ( $q_e$ , mg g<sup>-1</sup>) was calculated by Eq. (1):

$$q_e = \frac{V \cdot (C_0 - C_e)}{m} \quad (1)$$

where  $C_0$  (mg L<sup>-1</sup>) and  $C_e$  (mg L<sup>-1</sup>) represent the initial and equilibrium concentrations of Cr(VI) in solutions respectively,  $V$  (L) and  $m$  (g) represent volume and mass, respectively.

The study of adsorption kinetics is of great significance for the objective evaluation of Cr(VI) adsorption rate. The kinetics of adsorption of Cr(VI) on NSC-1.3 was analyzed by using pseudo-first-order and pseudo-second-order models, which were expressed as Eq. (2) and Eq. (3), respectively:<sup>1</sup>

$$\log(q_e - q_t) = \log q_e - \frac{tk_1}{2.3303} \quad (2)$$

$$\frac{t}{q_t} = \frac{1}{k_2 q_e^2} + \frac{t}{q_e} \quad (3)$$

where  $q_e$  (mg g<sup>-1</sup>) and  $q_t$  (mg g<sup>-1</sup>) represent the adsorption capacity at equilibrium and time  $t$ , respectively,  $k_1$  (min<sup>-1</sup>) and  $k_2$  (g min<sup>-1</sup> mg<sup>-1</sup>) represent the corresponding rate constants, respectively.

In order to evaluate the adsorption capacity of NSC-1.3 for Cr(VI), the Langmuir and Freundlich isothermal adsorption model was used to fit the experimental data at three temperatures. The models were expressed as Eq. (4) and Eq. (5), respectively:<sup>2</sup>

$$\frac{C_e}{q_e} = \frac{1}{q_m K_L} + \frac{C_e}{q_m} \quad (4)$$

$$\log q_e = \frac{1}{n} \log C_e + \log K_F \quad (5)$$

Where  $C_e$  ( $\text{mg L}^{-1}$ ) represents the equilibrium concentration, and  $q_e$  ( $\text{mg g}^{-1}$ ) and  $q_m$  ( $\text{mg g}^{-1}$ ) represent the equilibrium adsorption capacity and the maximum adsorption capacity, respectively,  $K_L$  ( $\text{L mg}^{-1}$ ) is Langmuir equilibrium constant,  $K_F$  ( $\text{mg g}^{-1}$ ) represents an adsorption coefficient, and  $n$  is the index coefficient.

The study of thermodynamic parameters such as Gibbs free energy change ( $\Delta G^\circ$ ), enthalpy ( $\Delta H^\circ$ ), and entropy change ( $\Delta S^\circ$ ) has profound significance to the specific adsorption process. These parameter values can be calculated by *Eq. (6)*, *Eq.(7)* and *Eq.(8)*, respectively:<sup>3</sup>

$$\Delta G^\circ = -RT \ln K_d \quad (6)$$

$$K_d = \frac{q_e}{C_e} \quad (7)$$

$$\ln K_d = \frac{\Delta S^\circ}{R} - \frac{\Delta H^\circ}{RT} \quad (8)$$

Where  $K_d$  is the thermodynamic equilibrium constant,  $R$  ( $8.314 \text{ J mol}^{-1} \text{ K}^{-1}$ ) is the gas constant, and  $T$  (K) is the experimental temperature.

## DFT simulation details

The density functional theory (DFT) was used for all calculations implemented in Dmol3 code.<sup>4,5</sup> The generalized-gradient approximation (GGA) of Perdew-Burke-Ernzerhof (PBE) functional<sup>6</sup> was utilized for all geometry optimization and electronic properties calculations. In intermolecular interactions long-range dispersion-correction was set by applying the Grimme's DFT-D correction.<sup>7,8</sup> Double numerical plus-polarization (DNP) basis set and DFT semicore pseudopotentials (DSPPs) were used for all the calculations.<sup>9</sup> While The thermal smearing was set to 0.005 au while the basis set cutoff was set to 4.6 Å. The convergence tolerance for geometries optimization was set to  $10^{-5}$  Ha, 0.001 Ha/ Å for the energy while 0.005 Å for force and displacement. The KFeS<sub>2</sub> structure was modeled according to the recently reported literature<sup>10</sup> which is depicted in Fig. S1. Then we selected single layer 1 x 5 x 1 non-periodic single layer to reduce the computational simulations cost and just to check the N doping effects on the KFeS<sub>2</sub> structure and there adsorption behaviors towards the Cr(VI).

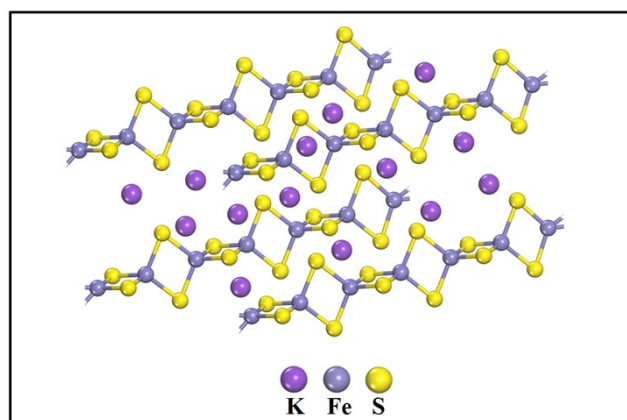

Fig. S1 Graphical representation of the KFeS<sub>2</sub> supercell structure.

The formation energy ( $E_f$ ) for N doped system was calculated as:

$$E_f = E_{N\text{KFeS}_2} - (E_{nN} + E_{\text{KFeS}_2} - E_{nS}) \quad (9)$$

where,  $E_{N\text{KFeS}_2}$  and  $E_{\text{KFeS}_2}$  are the total energy of the N doped  $\text{KFeS}_2$  layer and undoped  $\text{KFeS}_2$  layer while the  $E_{nN}$  and  $E_{nS}$  are the total energies of the isolated N and S atoms, respectively. The adsorption energy ( $E_{ad}$ ) was computed using the following equation:

$$E_{ad} = E_{\text{complex}} - (E_{M1} + E_{M2}) \quad (10)$$

here,  $E_{\text{complex}}$  is the total energy of the complex system ( $\text{H}_2\text{CrO}_4$  adsorbed over the pure or N doped  $\text{KFeS}_2$  layer) while  $E_{M1}$  and  $E_{M2}$  are the total energy of the individual monomers (isolated pure  $\text{KFeS}_2$ , N-doped  $\text{KFeS}_2$  layer and  $\text{H}_2\text{CrO}_4$ ).

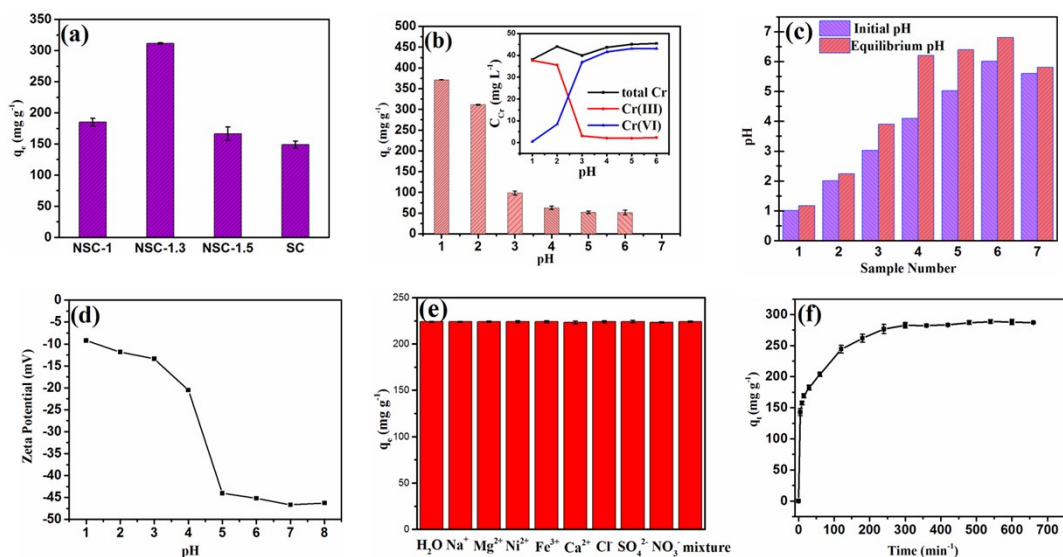

Fig. S2 (a) Adsorption properties of various adsorbents under the same conditions ( $m = 4$  mg,  $V = 30$  mL,  $T = 298$  K,  $C_0 = 50$  mg L<sup>-1</sup>), (b) impact of pH values ( $m = 4$  mg,  $V = 30$  mL,  $T = 298$  K,  $C_0 = 50$  mg L<sup>-1</sup>), the insertion diagram is chromium concentration at different pH conditions, (c) pH value changes before and after Cr(VI) adsorption, (d) Zeta potentials of NSC-1.3 in aqueous solution at different pH values, (e) impact of coexisting ions on Cr(VI) removal by NSC-1.3 ( $m = 4$  mg,  $V = 30$  mL,  $pH = 2$ ,  $T = 298$  K,  $C_0 = 30$  mg L<sup>-1</sup>), (f) impact of time on Cr(VI) removal by NSC-1.3 ( $m = 33.3$  mg,  $V = 250$  mL,  $pH = 2$ ,  $T = 298$  K,  $C_0 = 50$  mg L<sup>-1</sup>).

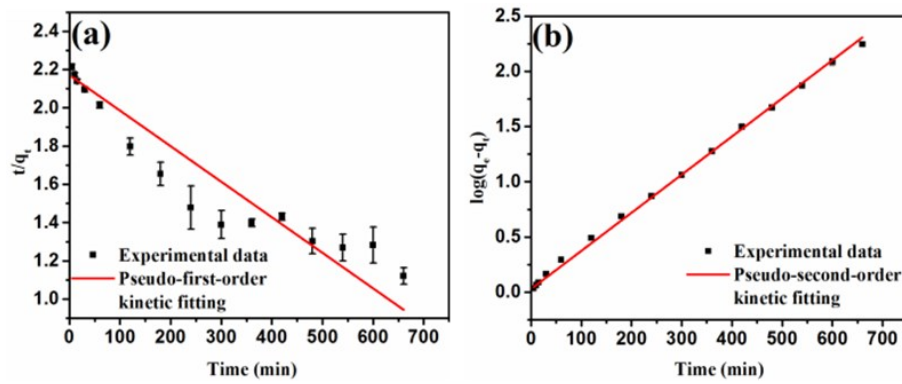

Fig. S3 (a) Pseudo first-order, (b) Pseudo second-order kinetic fitting of NSC-1.3 ( $m = 33.3$  mg,  $V = 250$  mL,  $\text{pH} = 2$ ,  $T = 298$  K,  $C_0 = 50$  mg  $\text{L}^{-1}$ ).

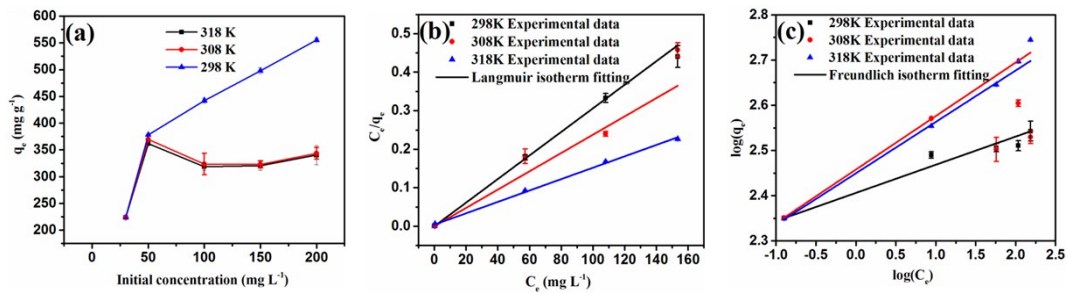

Fig. S4 (a) Effect of initial concentration and temperature, (b) Langmuir isotherm, (c) Freundlich isotherm fitting of NSC-1.3 at different temperatures ( $m = 4$  mg,  $V = 30$  mL,  $\text{pH} = 2$ ,  $C_0 = 30 - 300$  mg  $\text{L}^{-1}$ ).

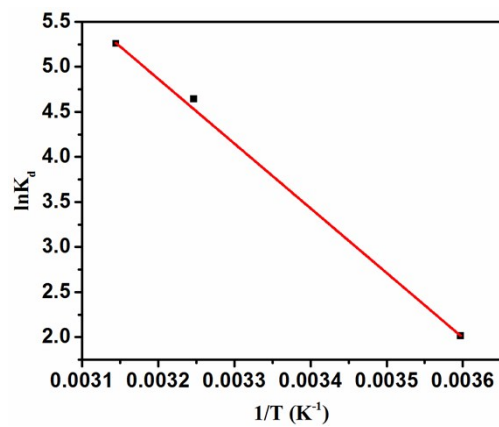

Fig. S5 Plot of  $\ln K_d$  against  $1/T$  for Cr(VI) removal on NSC-1.3 ( $m = 4$  mg,  $V = 30$  mL,  $\text{pH} = 2$ ,  $C_0 = 50$  mg L<sup>-1</sup>,  $T = 298 - 318$  K).



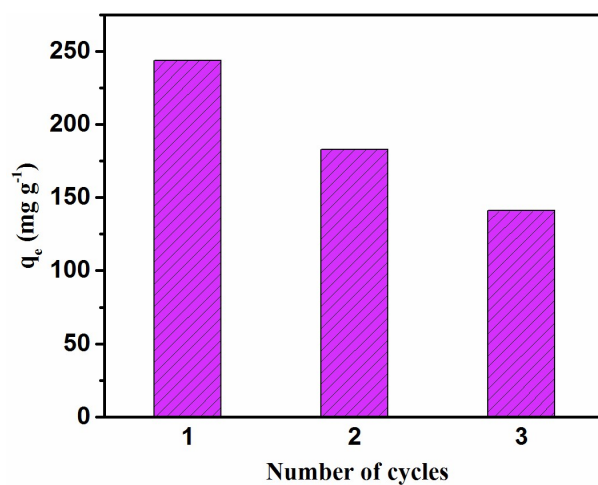

Fig. S6 Regeneration experiment of NSC-1.3 (pH = 2,  $C_0 = 50 \text{ mg L}^{-1}$ , No. 1:  $m = 4 \text{ mg}$ ,  $V = 30 \text{ mL}$ , No. 2:  $m = 2.7 \text{ mg}$ ,  $V = 20 \text{ mL}$ , No. 3:  $m = 2 \text{ mg}$ ,  $V = 15 \text{ mL}$ ).

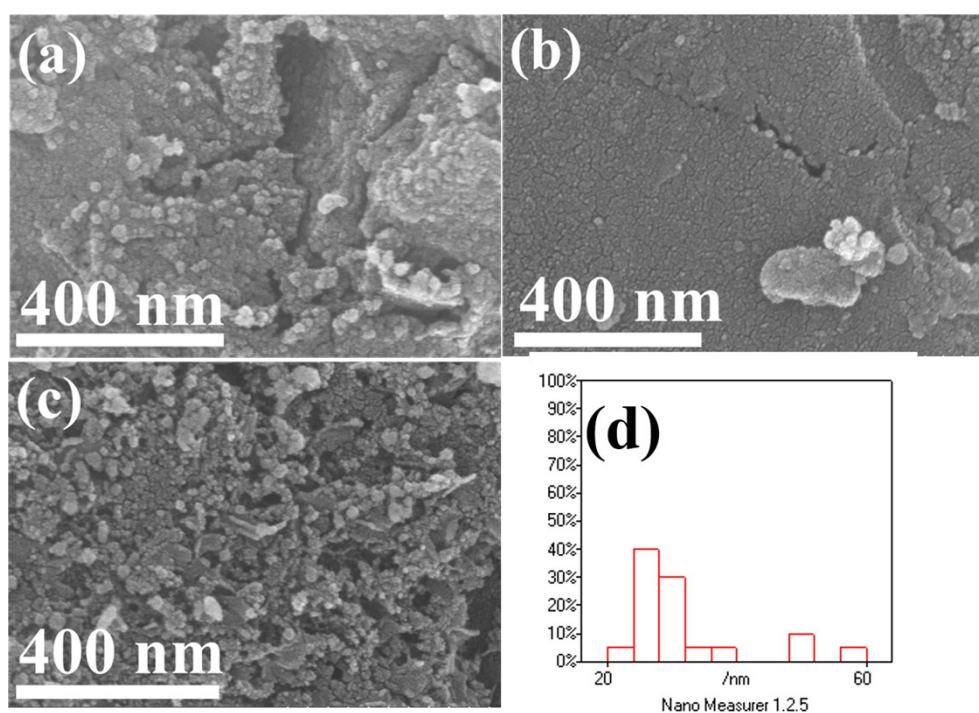

Fig. S7 (a) SEM image of primary NSC-1.3, (b) SEM image of NSC-1.3 after Cr(VI) adsorption, (c) SEM of NSC-1.3 after regeneration, (d) the diameter of nanoparticles from (c).

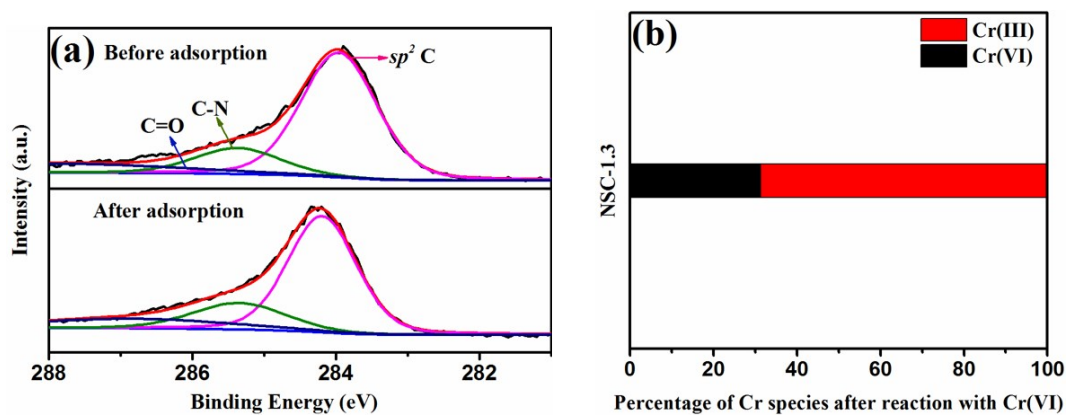

Fig. S8 (a) C 1s XPS spectra of NSC-1.3 before and after adsorption, (b) the percentage of Cr species after the reaction with Cr(VI).

Table S1 Comparison of removal properties of adsorbents for Cr(VI).

| Absorbents                                    | $q_{\max}$ (mg g <sup>-1</sup> ) | pH  | References |
|-----------------------------------------------|----------------------------------|-----|------------|
| HAB-derived Fe/C                              | 165.00                           | 2   | 11         |
| Fe/FeS                                        | 69.70                            | 5   | 12         |
| AMGO                                          | 123.40                           | 2   | 13         |
| NZVI/Fe <sub>3</sub> O <sub>4</sub> /graphene | 101.00                           | 3   | 14         |
| Fe@PC                                         | 10.07                            | 7   | 15         |
| Corn cob-derived magnetic AC                  | 125.00                           | 2   | 16         |
| Iron doped ordered mesoporous carbon          | 257.00                           | 5   | 17         |
| MAC-800                                       | 66.35                            | 4   | 18         |
| NDCS                                          | 432                              | 3   | 19         |
| N-doped carbon spheres                        | 181.82                           | 2   | 20         |
| HA-N-MPC                                      | 130.5                            | 2   | 21         |
| N-doped porous carbon(Ni)                     | 96.27                            | 2.5 | 22         |
| NSC-1.3                                       | 326.80                           | 2   | This work  |

Table S2 Thermodynamic parameters of Cr(VI) removal on NSC-1.3.

| $\Delta H^\circ$ (kJ mol <sup>-1</sup> ) | $\Delta S^\circ$ (J mol <sup>-1</sup> K <sup>-1</sup> ) | $\Delta G^\circ$ (kJ mol <sup>-1</sup> ) |          |          |
|------------------------------------------|---------------------------------------------------------|------------------------------------------|----------|----------|
|                                          |                                                         | 298 K                                    | 308 K    | 318 K    |
| 59.6868                                  | 231.4532                                                | -9.2863                                  | -11.6088 | -13.9153 |

Table S3 The content of different chemical states of N 1s and S 2p in NSC-1.3

|            | Sulphur content (%) |                              |                |       | Nitrogen content (%) |      |       |        |       |      |
|------------|---------------------|------------------------------|----------------|-------|----------------------|------|-------|--------|-------|------|
|            | Total               | S <sub>n</sub> <sup>2-</sup> | S <sub>8</sub> | S(VI) | Total                | N(I) | N(II) | N(III) | N(IV) | N(V) |
| Before     | 8.5                 | 45.1                         | 31.8           | 23.1  | 3.01                 | 19.9 | 19.9  | 20.0   | 20.1  | 20.1 |
| adsorption |                     |                              |                |       |                      |      |       |        |       |      |
| After      | 7.1                 | 39.5                         | 28.1           | 32.4  | 2.98                 | 33.9 | 11.2  | 28.9   | 18.3  | 7.7  |

adsorption

---

## References

- 1 M. Taghizadeh and S. Hassanpour, Selective adsorption of Cr(VI) ions from aqueous solutions using a Cr(VI)-imprinted polymer supported by magnetic multiwall carbon nanotubes, *Polym.*, 2017, **132**, 1-11.
- 2 K. Gong, Q. Hu, L. Yao, M. Li, D. Sun, Q. Shao, B. Qiu and Z. Guo, Ultrasonic pretreated sludge derived stable magnetic active carbon for Cr(VI) removal from wastewater, *ACS Sustain. Chem. Eng.*, 2018, **6**, 7283-7291.
- 3 F. Liu, X. Wang, B. Chen, S. Zhou and C. Chang, Removal of Cr(VI) using polyacrylonitrile/ferrous chloride composite nanofibers, *J. Taiwan Inst Chem Eng.*, 2017, **70**, 401-410.
- 4 B. Delley, An all-electron numerical method for solving the local density functional or polyatomic molecules, *J. Chem. Phys.*, 1990, **92**, 508–517.
- 5 B. Delley, from molecules to solids with the DMol3 approach, *J. Chem. Phys.*, 2000, **113**, 7756–7764.
- 6 J.P. Perdew, K. Burke and M. Ernzerhof, Generalized gradient approximation made simple, *Phys. Rev. Lett.*, 1996, **77**, 3865–3868.
- 7 S. Grimme, Accurate description of van der Waals complexes by density functional theory including empirical corrections, *J. Comput. Chem.*, 2004, **25**, 1463–1473.
- 8 S. Grimme, Semiempirical GGA-type density functional constructed with a long range dispersion correction, *J. Comput. Chem.*, 2006, **27**, 1787–1799.
- 9 P. Liu and J. Rodriguez, Catalysts for hydrogen evolution from the [NiFe] hydrogenase to the Ni<sub>2</sub>P (001) surface: the importance of ensemble effect, *J. Am. Chem. Soc.*, 2005, **127**, 14871–14878.

- 10 B. Vaccaro, S. Clarkson, J. Holden, D. Lee, C. Wu, F. Poole and H. Li, Biological iron-sulfur storage in a thioferrate-protein nanoparticle, *Nat. Commun.*, 2017, **8**, 1-9.
- 11 Y. Cui, H. He and J. D. Atkinson, Iron/Carbon Composites for Cr(VI) removal prepared from harmful algal bloom biomass via metal bioaccumulation or biosorption, *ACS Sustain. Chem. Eng.*, 2018, **7**, 1279-1288.
- 12 Y. Gong, L. Gai, J. Tang and J. Fu, Reduction of Cr(VI) in simulated groundwater by FeS-coated iron magnetic nanoparticles, *Sci. Total Environ.*, 2017, **595**, 743-751.
- 13 D. Zhao, X. Gao, C. Wu and R. Xie, Facile preparation of amino functionalized graphene oxide decorated with Fe<sub>3</sub>O<sub>4</sub> nanoparticles for the adsorption of Cr(VI), *Appl. Surf. Sci.*, 2016, **384**, 1-9.
- 14 X. Lv, X. Xue, G. Jiang, D. Wu, T. Sheng, H. Zhou and X. Xu, Nanoscale zero-valent iron (nZVI) assembled on magnetic Fe<sub>3</sub>O<sub>4</sub>/graphene for Chromium(VI) removal from aqueous solution, *J. Colloid Interface Sci.*, 2014, **417**, 51-59.
- 15 L. Zhuang, Q. Li, J. Chen, B. Ma and S. Chen, Carbothermal preparation of porous carbon-encapsulated iron composite for the removal of trace hexavalent chromium, *Chem. Eng. J.*, 2014, **253**, 24-33.
- 16 S. Nethaji, A. Sivasamy and A. B. Mandal, Preparation and characterization of corn cob activated carbon coated with nano-sized magnetite particles for the removal of Cr(VI), *Bioresour. Technol.*, 2013, **134**, 94-100.
- 17 L. Tang, G. Yang, G. Zeng, Y. Cai, S. Li, Y. Zhou, Y. Pang, Y. Liu, Y. Zhang and B. Luna, Synergistic effect of iron doped ordered mesoporous carbon on adsorption-coupled reduction of hexavalent chromium and the relative mechanism study, *Chem. Eng. J.*, 2014, **239**, 114-122.
- 18 C. Demarchi, B. Michel, N. Nedelko, A. Ślawska-Waniewska, P. Dłużewski, A. Kaleta, R. Minikayev, T. Strachowski, L. Lipińska, J. Magro and C. Rodrigues, Preparation, characterization, and application of magnetic activated carbon from termite feces for the adsorption of Cr(VI) from aqueous solutions, *Powder Technol.*, 2019, **354**, 432-441.

- 19 I. Hussain, J. Qi, X. Sun, L. Wang, J. Li, Melamine derived nitrogen-doped carbon sheet for the efficient removal of chromium(VI), *J. Mol. Liq.*, 2020, 318.
- 20 J. Wei , W. Cai, One-step hydrothermal preparation of N-doped carbon spheres from peanut hull for efficient removal of Cr(VI), *J. Environ. Chem. Eng.*, 2020, 8, 104449.
- 21 T. Zhang, S. Wei, G. Waterhouse, L. Fu, L. Liu, W. Shi, J. Sun, S. Ai, Chromium(VI) adsorption and reduction by humic acid coated nitrogen-doped magnetic porous carbon, *Powder Technol.*, 2019, 360.
- 22 S. Zhang, X. Wang, J. Li, T. Wen, J. Xu, X. Wang, Efficient removal of a typical dye and Cr(VI) reduction using N-doped magnetic porous carbon, *RSC Adv.*, 2014, 4, 63110-7.
